# Supplementary material for: Diversity of Tumor-Infiltrating, γδ T-Cell Abundance in Solid Cancers
Source: MDPI journal article supplement (doi:10.3390/cells9061537), 2020-06-24
Supplement: s1 [file s1]

## Appendix A

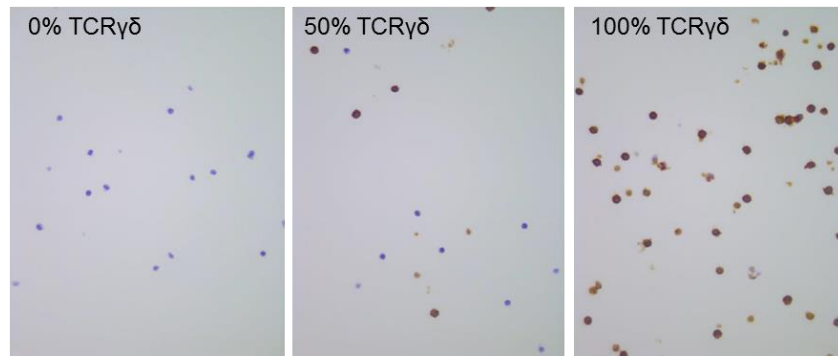

### Supplemental figure 1. Validation of the H41 anti-TCR $\gamma\delta$ antibody in cell suspensions by immunohistochemistry.

$\gamma\delta$  T cells were purified from PBMCs of healthy donors by positive immunoselection using a kit from Miltenyi Biotec. PBMCs depleted of  $\gamma\delta$  T cells were used to prepare cell suspensions that contained different percentages of purified  $\gamma\delta$  T cells, as indicated. Cell suspensions were embedded in an aqueous gel solution for histological and immunohistochemistry analysis with the H-41 anti-TCR $\gamma\delta$  monoclonal antibody, as described in Materials and Methods.

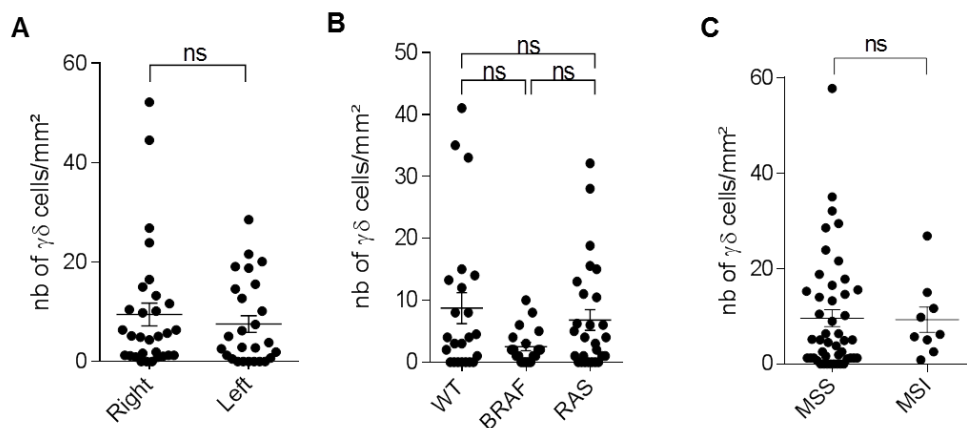

### Supplemental figure 2. Detection of $\gamma\delta$ T cells in human colon samples.

Detection by immunohistochemistry of  $\gamma\delta$  T cells in human colon cancer. (A) Scatter plot showing  $\gamma\delta$  T cell density in 56 colon cancer samples depending on the localization (left colon vs right colon). (B) Scatter plot showing  $\gamma\delta$  T cells density in the 77 colon cancer samples with mutational status information (WT, BRAF and RAS). (C) Scatter plot showing  $\gamma\delta$  T cells density in 55 colon cancer samples with microsatellite stability status information (mss : stable ; msi : instable). Data are the mean  $\pm$  SEM. ns, non-significant; \* $p < 0.05$ ; \*\*\*\* $p < 0.0001$  (Kruskal Wallis with Dunn's multiple comparison test).

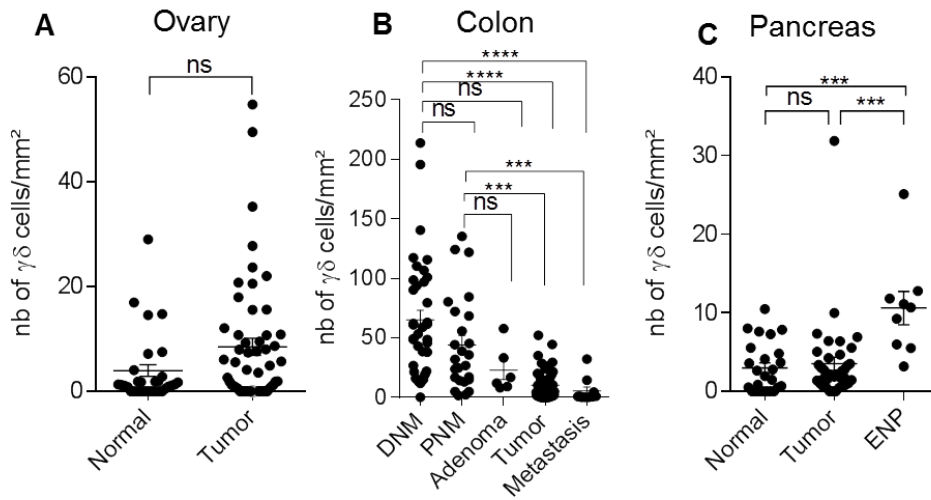

**Supplemental figure 3.  $\gamma\delta$  T cell density in colon, pancreas and ovary tumors from chemotherapy-naive patients.**

Detection by immunohistochemistry of  $\gamma\delta$  T cells in ovarian (A), colon (B) and pancreatic (C) cancer samples from patients who did not receive any neo-adjuvant therapy before tumor surgery. Data are the mean  $\pm$  SEM. ns, non-significant; \*  $p < 0.05$  (Kruskal Wallis with Dunn's multiple comparison test).

| <b>Parameter</b>              | <b>Total (n= 50)</b> |
|-------------------------------|----------------------|
| Median age at surgery (range) | 61.5 (30 - 88)       |
| T stage                       |                      |
| T1                            | 21 (42%)             |
| T2                            | 19 (38%)             |
| T3                            | 6 (12%)              |
| T4                            | 3 (6%)               |
| <i>Missing</i>                | 1 (2%)               |
| N stage                       |                      |
| N0                            | 22 (44%)             |
| N1                            | 11 (22%)             |
| N2                            | 6 (12%)              |
| N3                            | 8 (16%)              |
| <i>Missing</i>                | 3 (6%)               |
| M stage                       |                      |
| M0                            | 45 (90%)             |
| M1                            | 2 (4%)               |
| <i>Missing</i>                | 3 (6%)               |
| Grade                         |                      |
| I                             | 8 (16%)              |
| II                            | 20 (40%)             |
| III                           | 22 (44%)             |
| Breast cancer subgroup        |                      |
| RH+ HER2-                     | 14 (28%)             |
| RH+ HER2+                     | 9 (18%)              |
| RH- HER2+                     | 12 (24%)             |
| RH- HER2-                     | 15 (30%)             |
| Neoadjuvant treatment         |                      |
| Yes                           | 0 (0%)               |
| No                            | 50 (100%)            |

**Supplemental table 1. Main clinicopathological characteristics of the cohort of patients with breast cancer**

| Parameter                     | Total (103 patients/112 samples*) |                   |
|-------------------------------|-----------------------------------|-------------------|
| Sex                           | M                                 | 65                |
|                               | F                                 | 38                |
| Median age at surgery [range] | 66 [25-91]                        |                   |
| RAS/BRAF mutations            |                                   |                   |
|                               | RAS mutated                       | 27                |
|                               | BRAF mutated                      | 19                |
|                               | RAS/BRAF wt                       | 23                |
|                               | Undetermined                      | 43                |
| Microsatellite status         |                                   |                   |
|                               | MSS                               | 46                |
|                               | MSI                               | 9                 |
|                               | Undetermined                      | 57                |
| Adenoma                       | <b>6</b>                          |                   |
| Primary tumors                | <b>58</b>                         |                   |
|                               | Right colon                       | 30                |
|                               | Left colon                        | 26                |
|                               | Missing                           | 2                 |
|                               | Post-CT                           | 6 <sup>(1)</sup>  |
|                               | Chemo-naïve                       | 52                |
|                               | Stage I                           | 11                |
|                               | Stage II                          | 13                |
|                               | Stage III                         | 17                |
|                               | Stage IV                          | 11                |
| Metastasis                    | <b>45</b>                         |                   |
|                               | Liver                             | 23                |
|                               | Peritoneum                        | 17                |
|                               | Lung                              | 3                 |
|                               | Lymph node                        | 2                 |
|                               | Post-CT                           | 32 <sup>(2)</sup> |
|                               | Chemo-naïve                       | 13                |
| Local recurrence              | <b>3</b>                          |                   |
|                               | Post-CT                           | 2 <sup>(3)</sup>  |
|                               | Chemo-naïve                       | 1                 |

\* 5 patients displayed 2 or more lesions

<sup>(1)</sup> all patients received FOLFOX neo-adjuvant chemotherapy

<sup>(2)</sup> Folfox (16); Folfirinox (4); Folfiri-bevacizumab (3); Xeloda (3); Xelox (2); Folfiri (2); Folfiri/Panitumumab (1); Xeliri-bevacizumab (1)

<sup>(3)</sup> Folfox (1); LV5FU2 (1)

**Supplemental table 2. Main clinicopathological characteristics of the cohort of patients with colon cancer**

| Parameter                                   | Total (n= 50)           |
|---------------------------------------------|-------------------------|
| Sex                                         |                         |
| M                                           | 22 (44%)                |
| F                                           | 28 (56%)                |
| Median age at surgery (range)               | 67 (38-89)              |
| Neoadjuvant treatment                       |                         |
| Yes                                         | 11 <sup>(1)</sup> (22%) |
| No                                          | 39 (78%)                |
| <i>For chemo-naive samples only (n=39):</i> |                         |
| T stage                                     |                         |
| T1                                          | 5 (13%)                 |
| T2                                          | 13 (33%)                |
| T3                                          | 20 (51%)                |
| T4                                          | 1 (3%)                  |
| N stage                                     |                         |
| N0                                          | 12 (31%)                |
| N1                                          | 23 (59%)                |
| N2                                          | 4 (10%)                 |
| M stage                                     |                         |
| M0                                          | 36 (92%)                |
| M1                                          | 2 (5%)                  |
| MX                                          | 1 (3%)                  |
| R status                                    |                         |
| R0                                          | 34 (87%)                |
| R1                                          | 5 (13%)                 |

<sup>(1)</sup> Folfirinox (6); Gemcitabine (2); Folfirinox + RT/Gemcitabine (1); Folfirinox + RT/Capecitabine (1); RT/Gemcitabine (1)

*RT: radiotherapy*

**Supplemental table 3. Main clinicopathological characteristics of the cohort of patients with pancreatic cancer**

| Parameter                     | Total (n= 72)           |
|-------------------------------|-------------------------|
| Median age at surgery (range) | 61 (34-82)              |
| Neoadjuvant treatment         |                         |
| Yes                           | 18 <sup>(1)</sup> (25%) |
| No                            | 54 (75%)                |
| FIGO stage                    |                         |
| I                             | 4 (6%)                  |
| II                            | 4 (6%)                  |
| III                           | 54 (75%)                |
| IV                            | 9 (12%)                 |
| Missing                       | 1 (1%)                  |

**For chemotherapy-naive samples only (n=54):**

|          |          |
|----------|----------|
| T stage  |          |
| T1       | 4 (7%)   |
| T2       | 5 (9%)   |
| T3       | 41 (76%) |
| Missing  | 4 (7%)   |
| N stage  |          |
| N0       | 18 (33%) |
| N1       | 33 (61%) |
| Missing  | 3 (6%)   |
| M stage* |          |
| M0       | 8 (15%)  |
| M1       | 45 (83%) |
| Missing  | 2 (4%)   |

<sup>(1)</sup> Carboplatin/paclitaxel (16); carboplatin/paclitaxel/bevacizumab (2)

\* Including peritoneal metastases outside the pelvis, retroperitoneal lymphadenopathy and distant metastasis

**Supplemental table 4. Main clinicopathological characteristics of the cohort of patients with ovarian cancer**
